# Supplementary material for: Intravital imaging of glioma border morphology reveals distinctive cellular dynamics and contribution to tumor cell invasion
Source: PubMed Central journal article supplement (PMC6375955; doi:10.1038/s41598-019-38625-4), 2019-02-14
Supplement: 41598_2019_38625_MOESM1_ESM.pdf [file 41598_2019_38625_MOESM1_ESM.pdf]

1 **Title**

2 Intravital imaging of glioma border morphology reveals distinctive cellular dynamics and  
3 contribution to tumor cell invasion

4

5 **Authors**

6 Maria Alieva <sup>1,2\*#</sup>, Verena Leidgens <sup>1,3#</sup>, Markus J. Riemenschneider <sup>4</sup>, Christoph A. Klein <sup>5</sup>,

7 Peter Hau <sup>3\*\$</sup> and Jacco van Rheenen <sup>1,6\$</sup>

8

## 1 **Supplementary Figures**

### 2 **Supplementary Fig 1 Tumor infiltration patterns in human glioblastoma samples.**

3 Right column shows glioblastoma with typically *diffuse cell infiltration* in the surrounding  
4 brain tissue (right column). Note that there is a decreasing gradient in cell density from the  
5 upper right to the lower left of the images. Captured is a cortical infiltration zone (**CI**) with  
6 interspersed neurons. GFAP staining in the illustrated case hardly differentiates between  
7 infiltrative tumor cells and reactive astrocytes. A relevant number of tumor nuclei stain for the  
8 p53 tumor suppressor protein. Single tumor cell infiltration in the lower left of the image (**CI**)  
9 is highlighted by staining with the proliferation marker Ki-67 (MIB-1). Left column shows a  
10 tumor with a more circumscribed growth pattern with an appearance resembling the *well-*  
11 *defined tumor boarder* pattern in the model (red arrow). In the illustrated case solid tumor  
12 tissue (**T**) and surrounding non-neoplastic brain tissue (**B**) can be clearly differentiated. This is  
13 obvious also in the immunohistochemical stains with reactive GFAP expression and virtually  
14 absent p53 and MIB-1 labeling in the brain tissue (**B**). Note that the MIB-1 stain, however,  
15 highlights finger-shaped protrusions (black arrow) into the surrounding non-neoplastic tissue  
16 corresponding to the *invasive margin* pattern in the model. The finger-shaped protrusions can  
17 be also identified in the corresponding H&E image.

18

### 19 **Supplementary Fig 2 Velocity of different border configurations in individual mice.**

20 Quantification of cell velocity at indicated border and tumor core configurations. Data from  
21 individual mice and BTIC-10 and -12 is plotted in separate graphs. The data is shown as mean  
22  $\pm$  S.E.M.

23

### 24 **Supplementary Fig 3 Intraparenchymal and invasive tumor margin.**

1 Representative 3D reconstructed tile-scan showing perivascular and intraparenchymal *invasive*  
2 *margin*. Shown are H2B expressing BTICs in green, collagen fibers in blue, blood vessels in  
3 red. Scale bar = 300  $\mu\text{m}$ .

4

5 **Supplementary Fig 4 Comparison between the intraparenchymal and invasive tumor**  
6 **margin.**

7 (A) Quantification of cell velocity, percentage of motile (cell velocity > 2  $\mu\text{m}/\text{hour}$ ) and static  
8 cells, speed of motile cells and persistence of motile cells for the the intraparenchymal and  
9 invasive tumor margin. Data is shown as mean  $\pm$  S.E.M., n = 4 mice (BTIC-10 and BTIC-12  
10 lines). The data is shown as mean  $\pm$  S.E.M, n = 4 mice (BTIC-10 and BTIC-12 lines).  
11 \* $p < 0.05$ , \*\* $p < 0.01$ , \*\*\* $p < 0.0001$ , one-way ANOVA with Tukey's post hoc test. B)  
12 Representative still images from a time-lapse movie showing migrating tumor cells from  
13 perivascular and intraparenchymal *invasive margin*. White lines highlight individual tumor cell  
14 tracks. Scale bar = 30  $\mu\text{m}$ . (C) Percentage of invading and receding cells for each condition.  
15 (D) Quantification of the Y-axes displacement for invading and receding cells of each  
16 condition. n = 7 (BTIC-10 and BTIC-12). (E) Quantification of direction correlation between  
17 perivascular and intraparenchymal *invasive margin*. n = 4. <sup>ns</sup> $p > 0.05$ . One sample Student's *t*,  
18 hypothetical value = 0.

19

20 **Supplementary Fig 5 Direction of cell migration at different positions.**

21 Representative wind rose plots showing distinct direction of cell migration at individual  
22 positions from the different border configurations. Direction of a leaflet represents the  
23 percentage of cells migrating in that direction. Color scale indicates migration speed.

24

1 **Supplementary Fig 6 Linear regression model for cell spreading into the parenchyma.**

2 (A) Linear regression model for cell spreading with the corresponding coefficients for each  
3 border configuration type. Variables are explained in Table2. (B) Histograms showing the  
4 frequency distribution of the incidence of invasion within a position for the *invasive margin*  
5 and the *diffuse margin*.

6

7 **Supplementary Fig 7 Intracranial imaging window**

8 Descriptive image showing the cranial imaging window in the living mouse in overview and  
9 magnification.

10

11 **Supplementary tables**

12 **Supplementary Table 1 Summary of Mixed-effect Linear Regression Model for cell**  
13 **spreading perpendicular to the tumor border**

14

15 **Supplementary Table 2 List of simulation parameters**

16

17 **Supplementary movie**

18 **Supplementary Movie 1 Invasive front cell dynamics.**

19 Intravital imaging video showing BTIC-10 H2B-Dendra2 cells migrating in opposite directions  
20 at the *invasive margin*. Colored arrows follow individual cells of the *invasive margin*. Top:  
21 tumor core; bottom: brain parenchyma. Scale bar represents 30  $\mu\text{m}$ .

diffuse cell infiltration

well-defined tumor boarder  
invasive margin

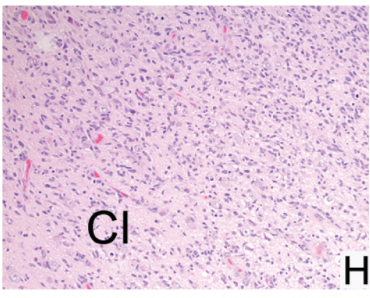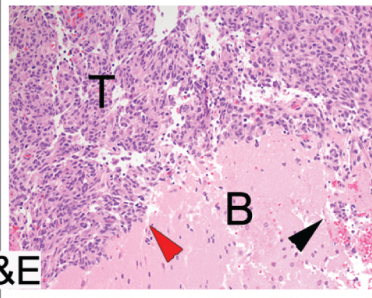

H&E

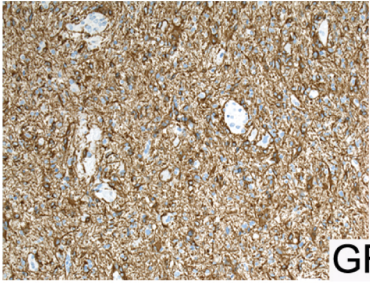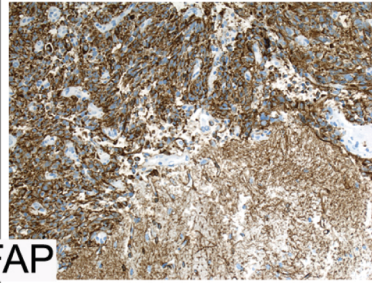

GFAP

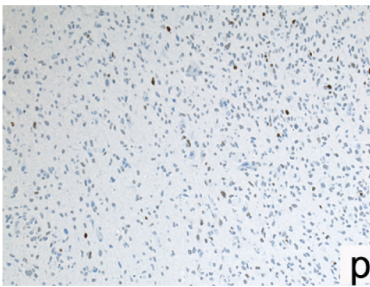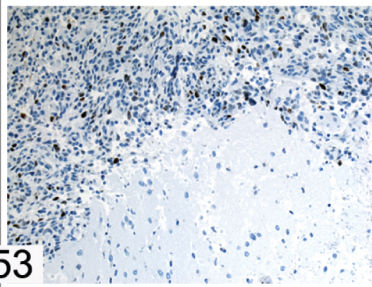

p53

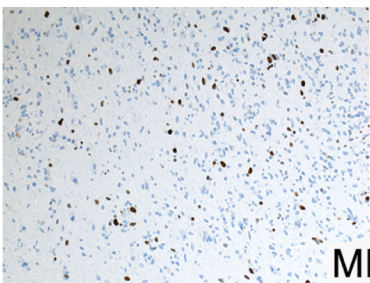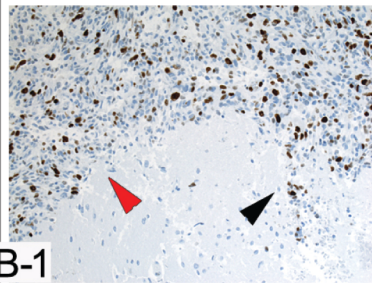

MIB-1

Mouse 1 BTIC 12

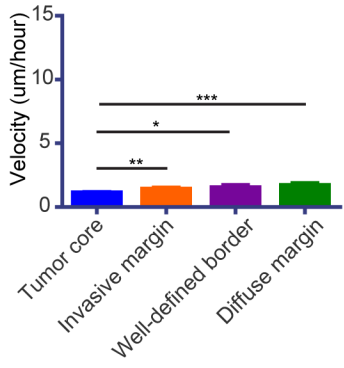

Mouse 2 BTIC 12

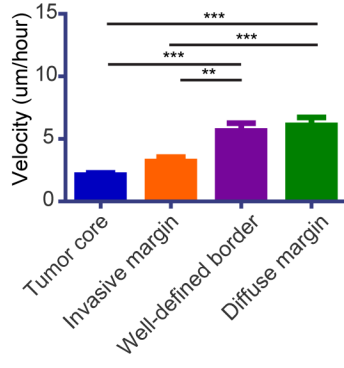

Mouse 3 BTIC 12

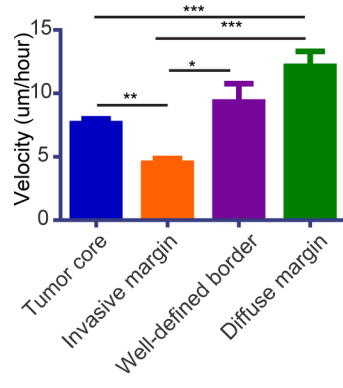

Mouse 4 BTIC 10

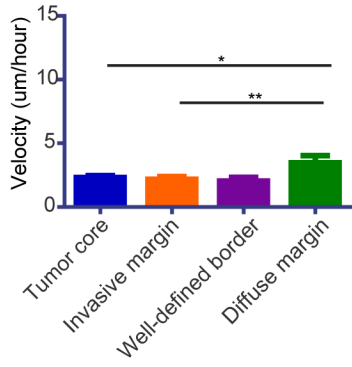

Mouse 5 BTIC 10

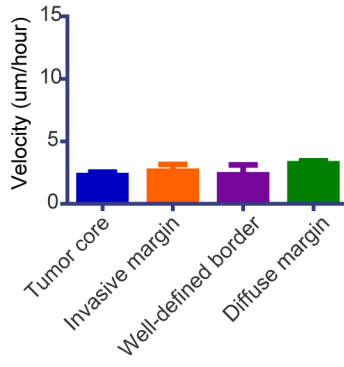

Mouse 6 BTIC 10

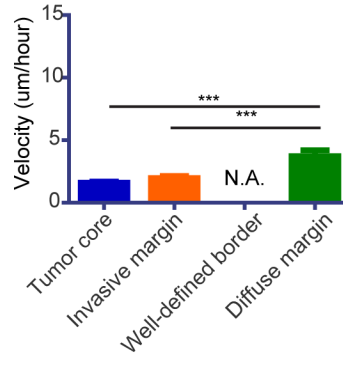

Mouse 7 BTIC 10

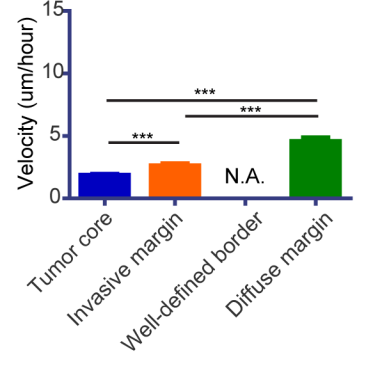

H2B Dendra2 BTIC-10 glioma cells

Collagen fibers

Blood vessels

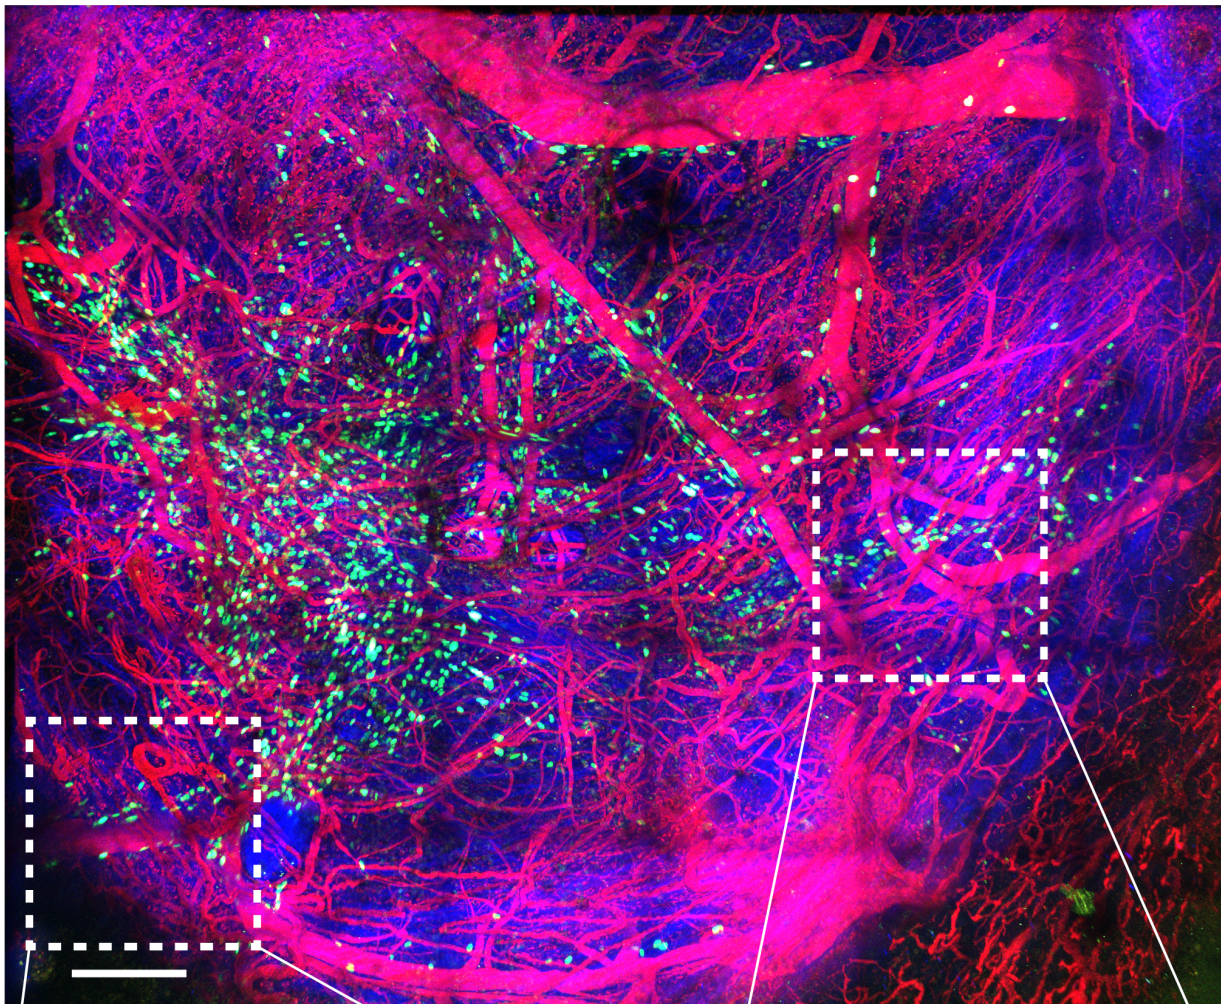

300um

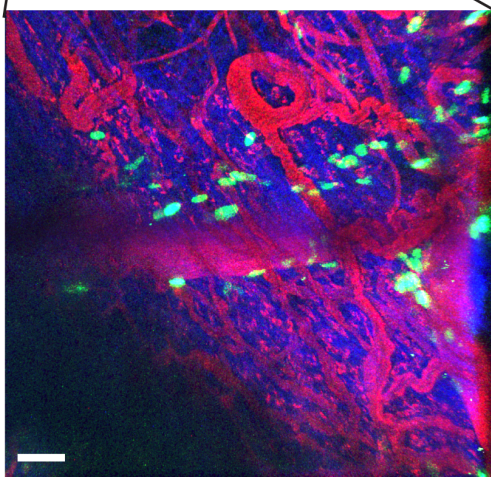

Perivascular invasive margin

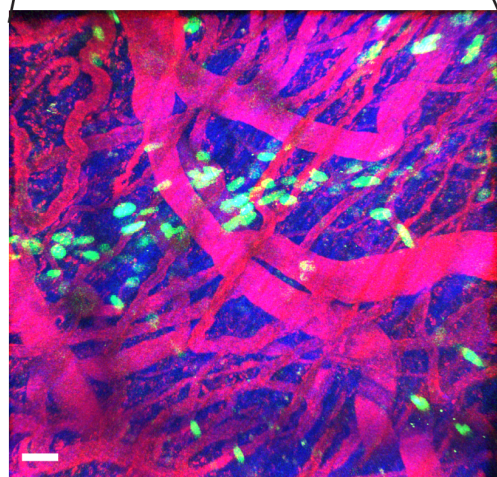

Intraparenchymal invasive margin

a

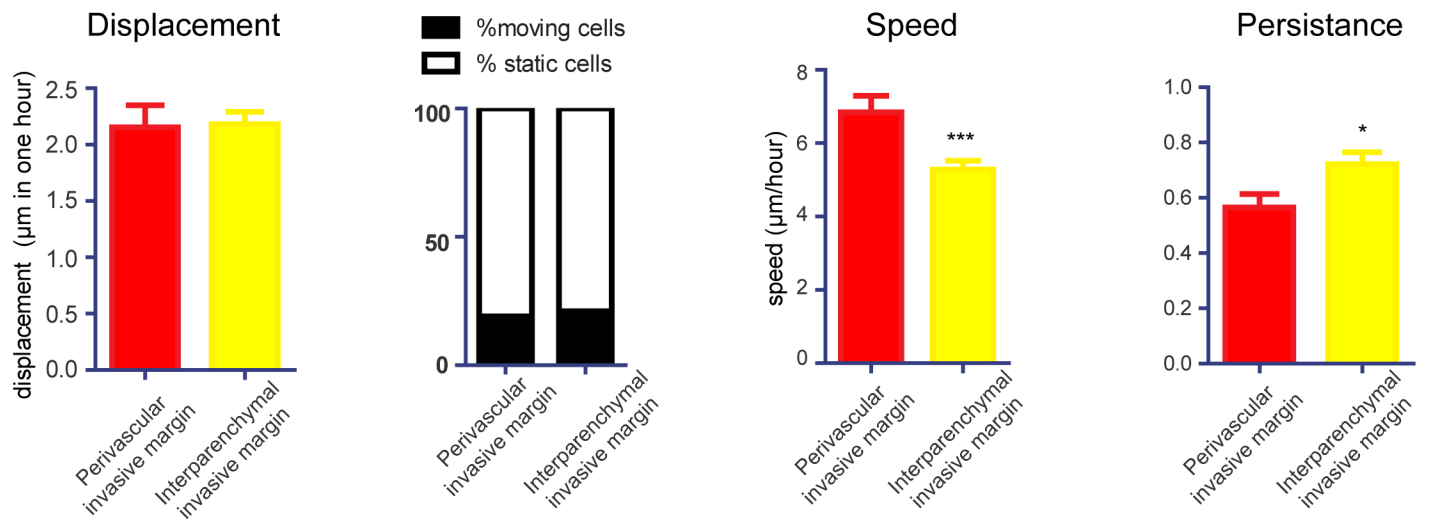

b

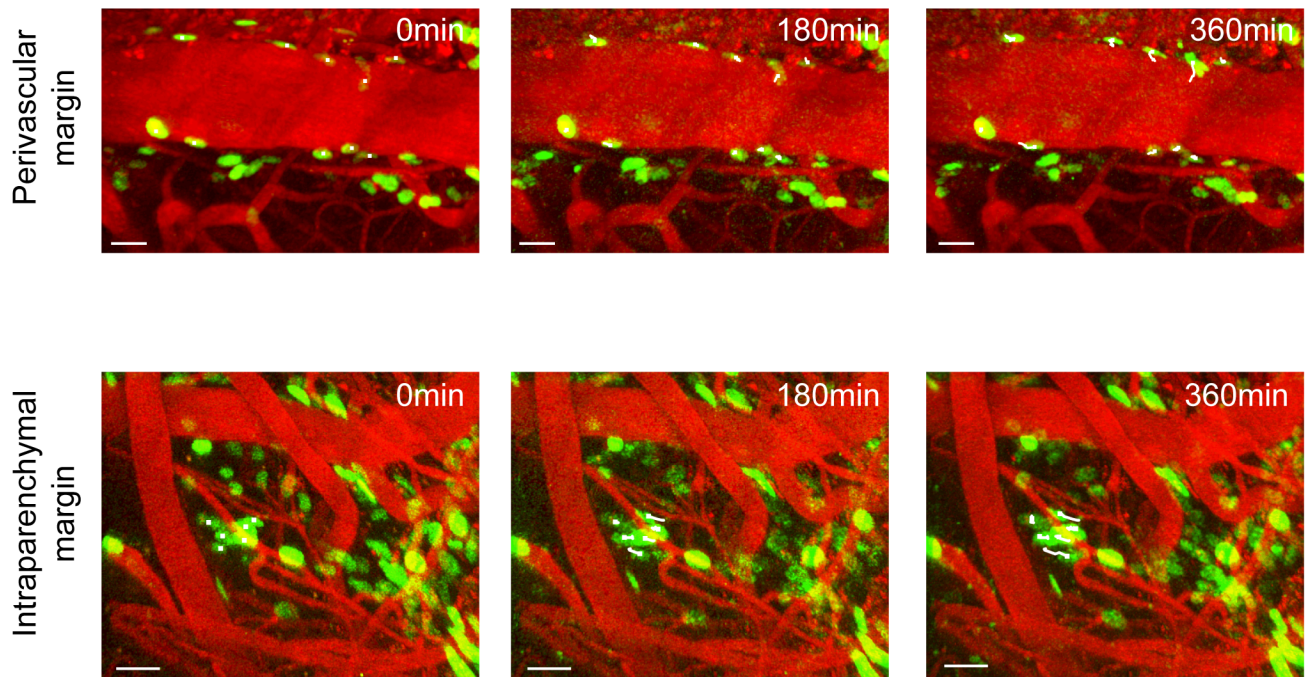

c

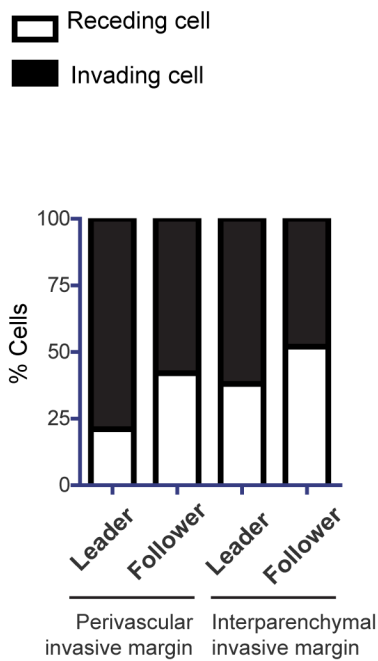

d

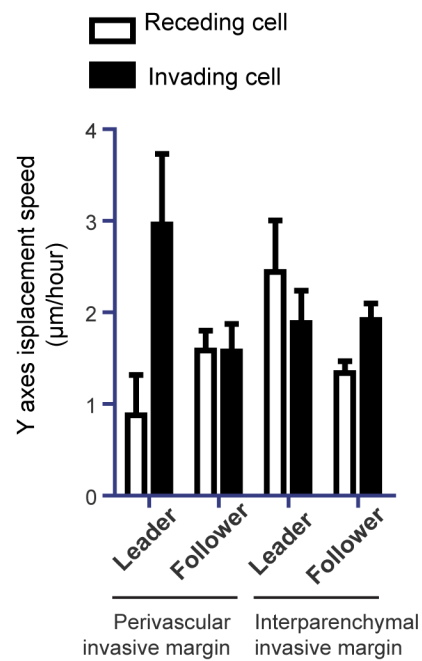

e

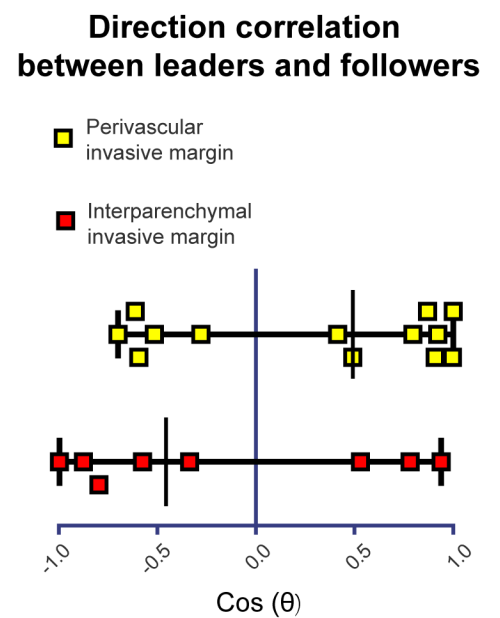



Diffuse margin

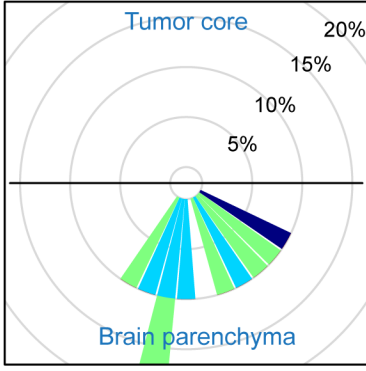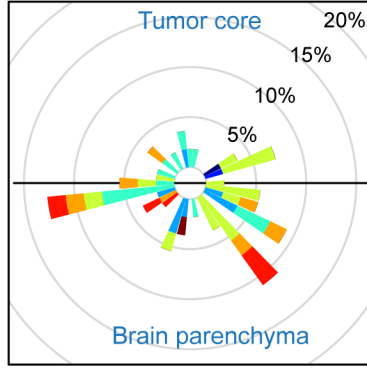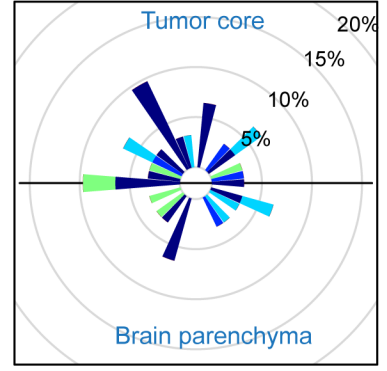

Well-defined border

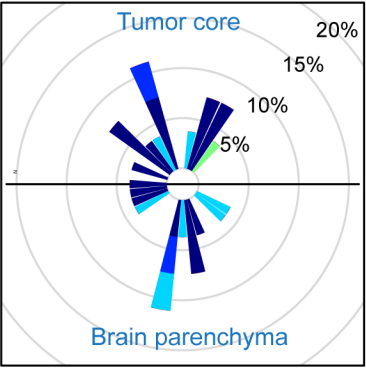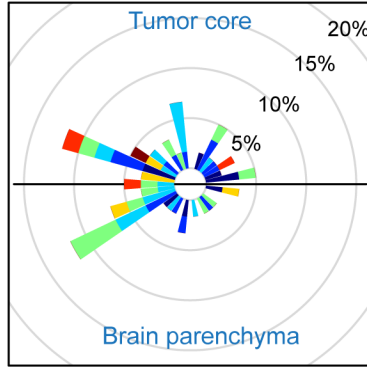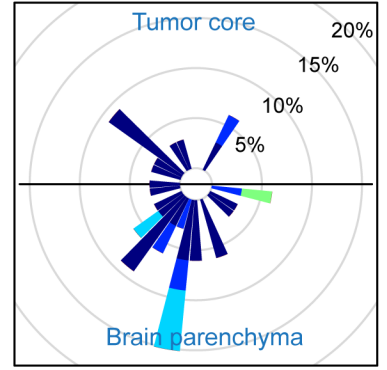

Invasive margin

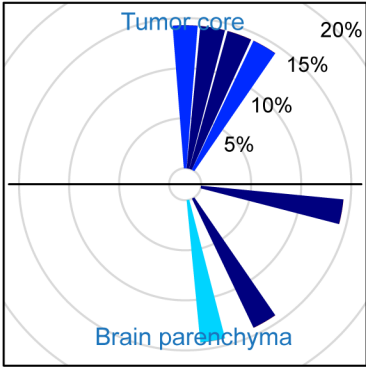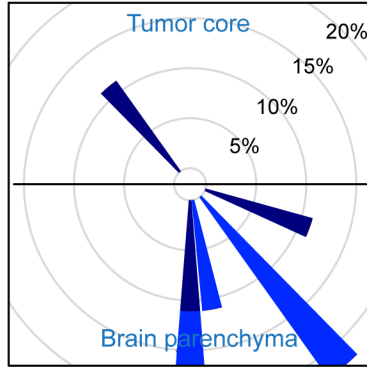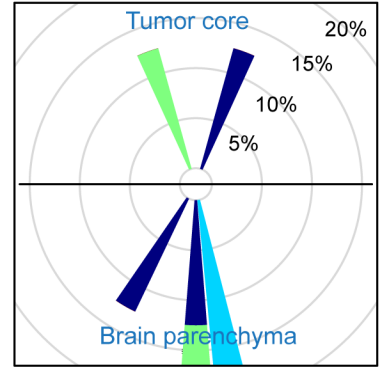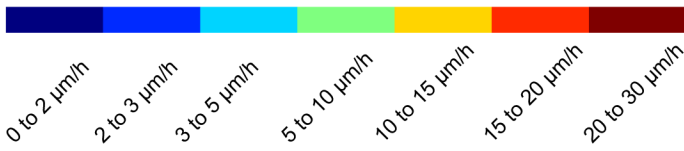

a

$$\text{COM } y_{\text{border}} = 0.36 + 0.86V_{\text{inv}} - 1.69(V_{\text{inv}} \times F_{\text{inv}})$$

$$\text{COM } y_{\text{invasive}} = 0.36 + 0.62V_{\text{inv}} - 1.69(V_{\text{inv}} \times F_{\text{inv}})$$

$$\text{COM } y_{\text{diffuse}} = 0.36 + 0.64V_{\text{inv}} - 1.69(V_{\text{inv}} \times F_{\text{inv}})$$

$$R^2 = 0.933$$

$$P < 0.001$$

b

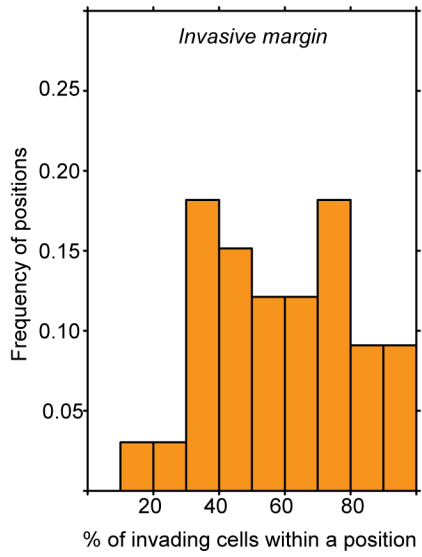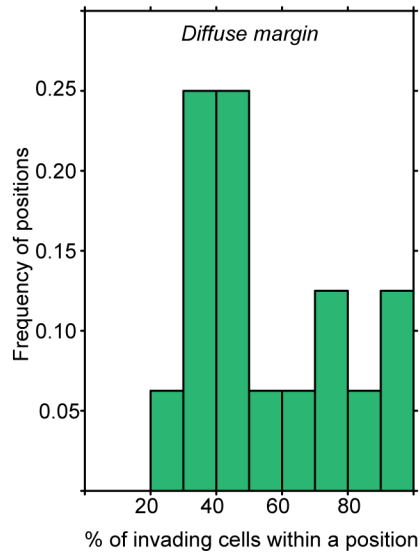

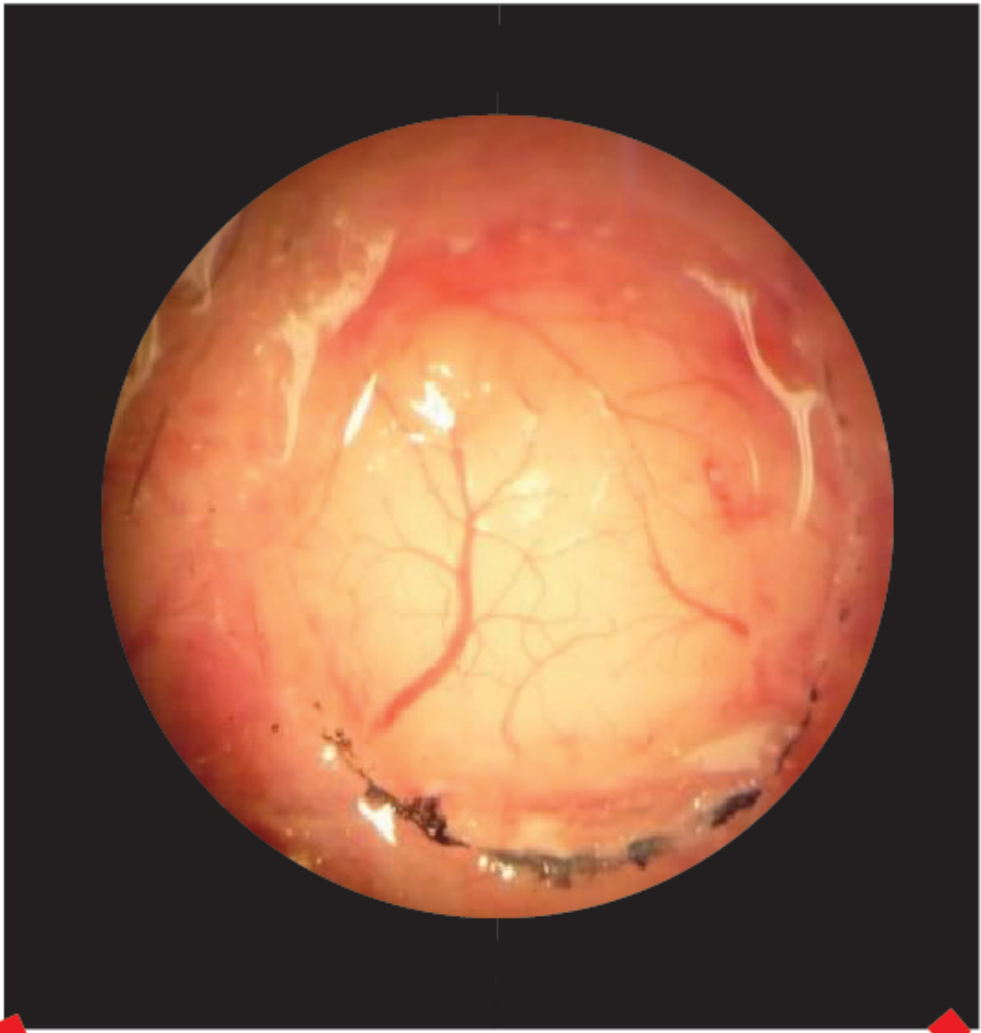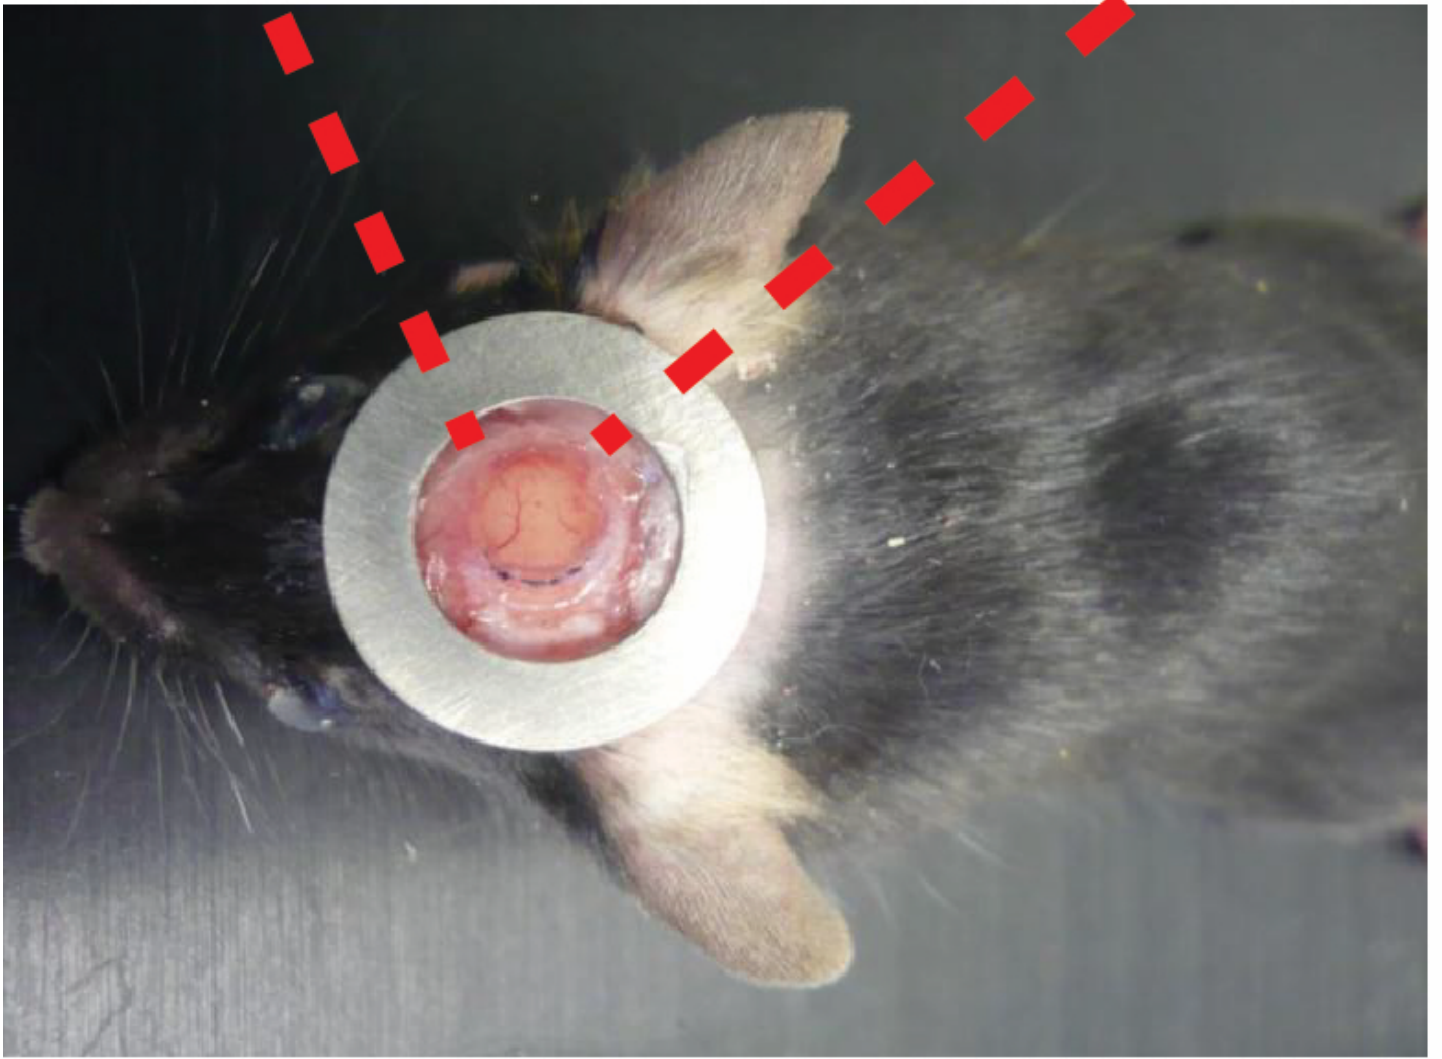

Formula:

COM  $y \sim \text{Vinv:T} + \text{Finv:Vinv} + (1 | \text{BTIC})$

Random effects:

| Groups   | Variance | Std.Dev. |
|----------|----------|----------|
| BTIC     | 0.003019 | 0.05495  |
| Residual | 0.131593 | 0.36276  |

Fixed effects:

|                | Estimate | Std.    | Error t value |
|----------------|----------|---------|---------------|
| (Intercept)    | 0.38738  | 0.10306 | 3.759         |
| Vinv:Tborder   | 0.84942  | 0.08389 | 10.126        |
| Vinv:Tinvasive | 0.62006  | 0.06715 | 9.233         |
| Vinv:Tdiffuse  | 0.64303  | 0.05678 | 11.324        |
| Vinv:Finv      | -1.68903 | 0.07633 | -22.128       |

---

| Parameter | Definition |
|-----------|------------|
|-----------|------------|

|      |                                                                                                                                                              |
|------|--------------------------------------------------------------------------------------------------------------------------------------------------------------|
| COMy | The difference in the centre of mass along the Y axes between its initial value and that at the end of the experiment per unit of time (h) within a position |
|------|--------------------------------------------------------------------------------------------------------------------------------------------------------------|

|      |                                                                                         |
|------|-----------------------------------------------------------------------------------------|
| Vinv | Absolute velocity perpendicular to the tumor border of invading cells within a position |
|------|-----------------------------------------------------------------------------------------|

|      |                                                                                           |
|------|-------------------------------------------------------------------------------------------|
| Vret | Absolute velocity perpendicular to the tumor border of retreating cells within a position |
|------|-------------------------------------------------------------------------------------------|

|      |                                               |
|------|-----------------------------------------------|
| Finv | Frequency of invading cells within a position |
|------|-----------------------------------------------|

|   |                              |
|---|------------------------------|
| T | Type of border configuration |
|---|------------------------------|

|      |                        |
|------|------------------------|
| BTIC | Type of BTIC cell line |
|------|------------------------|
